# Supplementary material for: The tumor microbiome is implicated in breast cancer prognosis
Source: Research Square preprint supplement (doi:10.21203/rs.3.rs-97367/v1), 2020-10-29
Supplement: Supplementary file 1 [file 9d432104bfcc4c5c18beff87.xlsx]

## Sheet: Table legends 
Table legends	Annotation
Table S1	Sequence counts of all samples of 16S rRNA gene sequencing.
Table S2	Sequence counts of 16S rRNA gene sequencing data after quality control, de-noising and removal of chimeras.
Table S3	Numbers of operational taxonomic units (OTUs) in all samples from 16S rRNA gene sequencing.
Table S4	Relative abundance of different tumor microbiota at genus level in patients experiencing no recurrence or metastasis (NRM) and patients experiencing recurrence or metastasis (R/M).
Table S5	Differences in Kyoto Encyclopedia of Genes and Genomes (KEGG) pathways (level 3) between tumor microbiomes of patients experiencing no recurrence or metastasis (NRM) and patients experiencing recurrence or metastasis (R/M).
Table S6	Number of reads per sample of RNA sequencing data.
Table S7	Tumor differentially expressed genes (DEGs) between patients experiencing no recurrence or metastasis (NRM) and patients experiencing recurrence or metastasis (R/M).
Table S8	Proportions of 22 subpopulations of tumor-infiltrating immune cells (TIICs) in all samples.
Table S9	Associations between tumor microbiome differences and differentially expressed genes (DEGs).
Table S10	Associations between tumor microbiome differences and differences in tumor-infiltrating immune cells (TIICs).

## Sheet: Table 1
Sample name	Sequence count
NRM_26	67118
NRM_06	66358
R_M_35	64838
R_M_29	59001
R_M_34	58838
R_M_03	58675
R_M_16	58336
R_M_10	57731
R_M_15	57104
R_M_07	57086
R_M_32	56977
R_M_08	56429
NRM_28	56011
R_M_17	55555
NRM_19	54829
NRM_34	54624
NRM_36	53948
R_M_02	53917
NRM_22	51682
R_M_27	51167
NRM_16	50908
NRM_11	50762
NRM_20	48171
R_M_21	47857
NRM_04	47254
NRM_33	47224
R_M_33	46464
R_M_23	46204
R_M_19	45113
NRM_10	44671
R_M_24	44253
NRM_01	43635
R_M_11	43305
NRM_30	43123
NRM_27	42491
R_M_13	42264
R_M_31	42056
R_M_04	41375
R_M_28	39898
NRM_35	38898
NRM_32	38176
R_M_20	37815
NRM_05	37501
NRM_15	37255
R_M_18	36708
R_M_25	35196
NRM_12	34345
NRM_24	34104
NRM_25	33480
R_M_30	33465
R_M_06	32965
NRM_29	32340
R_M_09	32145
R_M_22	31169
NRM_13	30669
R_M_05	30573
NRM_09	16605

## Sheet: Table 2
sample-id	input	filtered	denoised	merged	non-chimeric
NRM_01	43635	38862	38862	38238	37816
NRM_04	47254	43141	43141	42829	42827
NRM_05	37501	32445	32445	32191	32191
NRM_06	66358	48215	48215	47965	47965
NRM_09	16605	14150	14150	13997	13987
NRM_10	44671	35741	35741	35546	35546
NRM_11	50762	45497	45497	45213	45213
NRM_12	34345	29698	29698	29524	29524
NRM_13	30669	26579	26579	26390	26390
NRM_15	37255	32655	32655	32307	32307
NRM_16	50908	45262	45262	45146	45146
NRM_19	54829	49077	49077	48709	48709
NRM_20	48171	42978	42978	42532	42532
NRM_22	51682	46334	46334	45868	45868
NRM_24	34104	30110	30110	29975	29975
NRM_25	33480	28712	28712	28375	28375
NRM_26	67118	48262	48262	47960	47869
NRM_27	42491	37854	37854	37572	37557
NRM_28	56011	49512	49512	49237	49222
NRM_29	32340	28751	28751	28215	28162
NRM_30	43123	37855	37855	37674	37674
NRM_32	38176	33369	33369	31946	31942
NRM_33	47224	41601	41601	41331	41331
NRM_34	54624	49080	49080	48852	48852
NRM_35	38898	34355	34355	33988	33963
NRM_36	53948	48975	48975	48778	48778
R_M_02	53917	49452	49452	49353	49249
R_M_03	58675	54741	54741	53926	53079
R_M_04	41375	32836	32836	32612	32612
R_M_05	30573	26992	26992	26766	26745
R_M_06	32965	29063	29063	28827	28827
R_M_07	57086	51087	51087	50760	50756
R_M_08	56429	50218	50218	49927	49927
R_M_09	32145	27433	27433	26966	26929
R_M_10	57731	42495	42495	42327	42326
R_M_11	43305	34015	34015	33851	33851
R_M_13	42264	37597	37597	37418	37418
R_M_15	57104	51114	51114	50939	50939
R_M_16	58336	51872	51872	51819	51819
R_M_17	55555	49292	49292	49135	49135
R_M_18	36708	32530	32530	32342	32319
R_M_19	45113	39823	39823	39737	39737
R_M_20	37815	30234	30234	30104	30104
R_M_21	47857	42668	42668	42504	42504
R_M_22	31169	27264	27264	26076	26073
R_M_23	46204	36871	36871	36075	36045
R_M_24	44253	34734	34734	33985	33985
R_M_25	35196	30913	30913	30383	30382
R_M_27	51167	44753	44753	44698	44698
R_M_28	39898	33054	33054	32914	32913
R_M_29	59001	52158	52158	52084	52084
R_M_30	33465	30798	30798	30605	30591
R_M_31	42056	33360	33360	33015	33002
R_M_32	56977	51191	51191	50985	50985
R_M_33	46464	41684	41684	41397	41397
R_M_34	58838	53275	53275	53149	53143
R_M_35	64838	58528	58528	58352	58352

## Sheet: Table 3
Sample	Kingdom	Phylum	Class	Order	Family	Genus	Species	OTU
NRM_01	613	609	605	586	496	335	92	613
NRM_04	203	166	155	147	123	88	21	203
NRM_05	128	115	114	111	96	71	21	128
NRM_06	90	89	88	86	76	56	12	90
NRM_09	86	83	79	76	69	50	11	86
NRM_10	96	80	77	74	66	57	15	96
NRM_11	171	133	130	123	111	84	21	171
NRM_12	102	80	76	74	66	48	9	102
NRM_13	96	78	75	72	68	52	13	96
NRM_15	136	127	124	122	101	82	29	136
NRM_16	66	54	50	47	43	34	9	66
NRM_19	192	171	166	158	131	96	26	192
NRM_20	222	188	184	176	143	95	26	222
NRM_22	226	197	196	190	162	111	37	226
NRM_24	117	115	110	105	86	49	17	117
NRM_25	160	127	120	116	105	79	24	160
NRM_26	180	133	126	120	95	69	14	180
NRM_27	122	114	113	102	83	62	14	122
NRM_28	172	152	146	142	114	77	21	172
NRM_29	279	216	204	194	162	111	31	279
NRM_30	97	86	85	83	71	46	11	97
NRM_32	501	492	487	465	380	231	55	501
NRM_33	134	119	116	113	93	68	20	134
NRM_34	174	169	169	158	130	91	27	174
NRM_35	177	139	138	130	107	71	12	177
NRM_36	116	104	103	97	76	48	10	116
R_M_02	168	165	164	157	145	120	43	168
R_M_03	737	703	688	657	522	332	93	737
R_M_04	125	116	113	107	82	51	13	125
R_M_05	89	79	77	75	59	44	11	89
R_M_06	129	106	98	94	80	56	12	129
R_M_07	156	156	152	149	127	91	21	156
R_M_08	151	105	99	95	88	79	24	151
R_M_09	88	61	58	57	51	44	11	88
R_M_10	115	90	88	83	74	65	18	115
R_M_11	49	45	44	40	36	30	7	49
R_M_13	64	50	47	44	40	36	10	64
R_M_15	113	94	91	85	80	71	21	113
R_M_16	41	41	41	39	32	28	5	41
R_M_17	66	56	56	54	50	43	8	66
R_M_18	81	71	69	68	63	53	16	81
R_M_19	46	42	41	40	37	29	6	46
R_M_20	105	55	49	45	39	31	8	105
R_M_21	120	107	102	99	85	66	18	120
R_M_22	576	562	548	499	374	199	34	576
R_M_23	423	394	388	366	287	166	40	423
R_M_24	330	322	319	293	233	133	29	330
R_M_25	208	204	203	195	152	90	19	208
R_M_27	40	40	40	40	34	28	9	40
R_M_28	88	83	80	75	67	50	20	88
R_M_29	86	79	77	73	63	50	15	86
R_M_30	98	71	68	67	60	43	15	98
R_M_31	119	88	84	81	76	56	16	119
R_M_32	98	83	80	78	72	62	19	98
R_M_33	104	54	45	43	37	28	6	104
R_M_34	105	76	70	68	61	51	11	105
R_M_35	107	75	72	70	64	53	11	107
SUM	4569	4151	4044	3814	3054	1861	440	4569

## Sheet: Table 4
Taxonomy	NRM_01	NRM_04	NRM_05	NRM_06	NRM_09	NRM_10	NRM_11	NRM_12	NRM_13	NRM_15	NRM_16	NRM_19	NRM_20	NRM_22	NRM_24	NRM_25	NRM_26	NRM_27	NRM_28	NRM_29	NRM_30	NRM_32	NRM_33	NRM_34	NRM_35	NRM_36	R_M_02	R_M_03	R_M_04	R_M_05	R_M_06	R_M_07	R_M_08	R_M_09	R_M_10	R_M_11	R_M_13	R_M_15	R_M_16	R_M_17	R_M_18	R_M_19	R_M_20	R_M_21	R_M_22	R_M_23	R_M_24	R_M_25	R_M_27
Ruminococcus	0.00023933	0.00077083	0	0	0.000143051	0	0.00026541	0.000338765	0	0.000340483	0	0.000123198	0	0	0	0.000105772	0	0	8.12843e-05	0	0	0.0018787	9.67797e-05	0.00124895	0	0	6.09273e-05	0.000321094	0	0	0	9.85105e-05	0	0	0	0	0	0	0	6.10563e-05	0	5.03309e-05	0	0	0.000386056	0	0	0	0
Anaerostipes	7.97766e-05	0	0	0	0.000286103	0	0	0	0	0	0	0	0	0	0	0	0	0	0	0	0	0.00018787	0	0.000143322	0	0	0	0	0	0	0	0	0	0	0	0	0	0	0	0	0	0	0	0	0	0	0	0	0
Weissella	0.000425475	0	0	0	0	0	0	0	0	0	0	0.000143731	0	0	0	0	0	0	0	0	0	0.000156558	0	0	0	0.000225558	0	0	0	0	0	0	0	0	0	0	0	0	0	0	0	0	0	0	0	0	0	0	0
Butyrivibrio	0	0.000163509	0	0.000125091	0.000429154	0	0	0	0	6.19061e-05	0	0.000123198	0	0	0	0.000141029	0	0	0	0	0	0.00037574	0	0	0	0	0	0	0	0	0	0	0	0	0	0	0	0	0	0	0	0	0.000132873	0	0	0	0	0	0
Dechloromonas	0.0010371	0.000210226	0.000497141	0	0	0	0	0	0	0	0	0.000431194	0.00044687	0.00030541	0.00013348	0	0.000564452	0.000452754	0.000101605	0.000674932	0.00045124	0.000250493	0.000145169	0.000286644	0	0.000143537	0	0.00440088	0	0	0.000381772	0	0	0	0	0	0	0	0	0	0	0	0	0.000117644	0.00810717	0.00247642	0.00303898	0.000263366	0
Anaerococcus	0.0101316	0.00144823	0.0015225	0	0	0	0.000464468	0	0	0	0	0	0.000117597	0.000109075	0	0.00126926	0	0.000133163	0.000101605	0.000177614	0.000106174	0	0	0.000143322	0.00114858	0	0.0494324	0.00370202	0	0	0	0	0.000440926	0	7.08784e-05	0	5.34502e-05	0	0	0	0	0	0	0	0	0	0	0	0
Thiothrix	0	0	0	0	0	0	0	0	0	0	0	0	0	0	0	0	0	0	0	0	0	0	0	0	0	0	0	0.000169991	0	0	6.94131e-05	0	0	0	0	0	0	0	0	0	0	0	0	0	0.000193028	0.000333899	0.000324551	0	0
Microbacterium	0.00124983	0	0	0	0	0.000253229	0	0	0	0	0	0.000143731	0	0	0	0	0	0	0	0	0	0	0	0	0	0	0	0.00088773	0	0	0	0.000275829	6.01263e-05	0	0.000401644	0	0	0.000549709	0	0	0	7.54964e-05	0.000298964	0	0.000386056	0.000139125	0	0	4.47447e-05
Deinococcus	0.000319107	0.000140151	0	0	0	0	0	0	0	0.000464296	0.000199371	0	0.000376311	0.00091623	0	0.000141029	0.000125434	0	8.12843e-05	0.00039075	0	0	0	8.18984e-05	0	6.15157e-05	6.09273e-05	0.000113327	0	0	0	0	0.000140295	0	0	0	0	0	0	4.07042e-05	0.000123766	0	0	0	0	0.00105735	0	0	0
[truncated: 9 more columns]

## Sheet: Table 5
KEGG_pathway	KW_pvalue	DunnTest_comparison	DunnTest_Z	DunnTest_PValueAdjusted
Indole alkaloid biosynthesis	0.00677573	NRM - R_M	2.70767	0.00338786
Carbohydrate digestion and absorption	0.00710998	NRM - R_M	2.69165	0.00355499
Bacterial invasion of epithelial cells	0.00765898	NRM - R_M	2.66675	0.00382949
Translation proteins	0.0108512	NRM - R_M	2.54745	0.00542562
Atrazine degradation	0.0113598	NRM - R_M	-2.53143	0.0056799
Restriction enzyme	0.0113598	NRM - R_M	2.53143	0.0056799
Peptidases	0.0155513	NRM - R_M	2.41928	0.00777564
RNA degradation	0.0155513	NRM - R_M	2.41928	0.00777564
Peptidoglycan biosynthesis	0.0177297	NRM - R_M	2.37121	0.00886487
Isoflavonoid biosynthesis	0.0178262	NRM - R_M	2.36921	0.0089131
Flavone and flavonol biosynthesis	0.0193266	NRM - R_M	2.33917	0.00966329
Vitamin B6 metabolism	0.0193266	NRM - R_M	2.33917	0.00966329
Glyoxylate and dicarboxylate metabolism	0.0201711	NRM - R_M	-2.32315	0.0100856
Amino acid related enzymes	0.0248942	NRM - R_M	2.24304	0.0124471
D-Alanine metabolism	0.025946	NRM - R_M	2.22702	0.012973
Geraniol degradation	0.025946	NRM - R_M	-2.22702	0.012973
Drug metabolism - cytochrome P450	0.027036	NRM - R_M	-2.211	0.013518
Phenylalanine, tyrosine and tryptophan biosynthesis	0.027036	NRM - R_M	2.211	0.013518
Lysine biosynthesis	0.0293351	NRM - R_M	2.17895	0.0146675
Ribosome Biogenesis	0.0305464	NRM - R_M	2.16293	0.0152732
Amino sugar and nucleotide sugar metabolism	0.0344413	NRM - R_M	2.11487	0.0172207
Chromosome	0.0344413	NRM - R_M	2.11487	0.0172207
Inositol phosphate metabolism	0.0344413	NRM - R_M	-2.11487	0.0172207
Mismatch repair	0.0372673	NRM - R_M	2.08282	0.0186337
Translation factors	0.0372673	NRM - R_M	2.08282	0.0186337
Styrene degradation	0.0387528	NRM - R_M	-2.0668	0.0193764
Homologous recombination	0.0402884	NRM - R_M	2.05078	0.0201442
Glycosylphosphatidylinositol(GPI)-anchor biosynthesis	0.0407592	NRM - R_M	2.04597	0.0203796
Fatty acid elongation in mitochondria	0.0432001	NRM - R_M	2.02177	0.0216001
One carbon pool by folate	0.0435146	NRM - R_M	2.01874	0.0217573
Biosynthesis of type II polyketide backbone	0.0449621	NRM - R_M	2.00501	0.022481
Cell division	0.0487615	NRM - R_M	1.97067	0.0243807
DNA repair and recombination proteins	0.0487615	NRM - R_M	1.97067	0.0243807
Phosphatidylinositol signaling system	0.0487615	NRM - R_M	1.97067	0.0243807
Pyrimidine metabolism	0.0487615	NRM - R_M	1.97067	0.0243807
Vibrio cholerae infection	0.0487615	NRM - R_M	1.97067	0.0243807
D-Glutamine and D-glutamate metabolism	0.0506244	NRM - R_M	1.95465	0.0253122
RNA polymerase	0.0525467	NRM - R_M	1.93863	0.0262733
Focal adhesion	0.0545647	NRM - R_M	1.92233	0.0272824
CAM ligands	0.058117	NRM - R_M	1.89481	0.0290585
ECM-receptor interaction	0.058117	NRM - R_M	1.89481	0.0290585
Metabolism of xenobiotics by cytochrome P450	0.0586827	NRM - R_M	-1.89056	0.0293414
Purine metabolism	0.0586827	NRM - R_M	1.89056	0.0293414
DNA replication proteins	0.0608559	NRM - R_M	1.87454	0.0304279
Cysteine and methionine metabolism	0.0630953	NRM - R_M	1.85852	0.0315477
Dioxin degradation	0.0654024	NRM - R_M	-1.8425	0.0327012
Steroid hormone biosynthesis	0.0654024	NRM - R_M	-1.8425	0.0327012
Tyrosine metabolism	0.0654024	NRM - R_M	-1.8425	0.0327012
Circadian rhythm - plant	0.0677786	NRM - R_M	1.82648	0.0338893
Cytochrome P450	0.0677786	NRM - R_M	-1.82648	0.0338893
Nicotinate and nicotinamide metabolism	0.0677786	NRM - R_M	1.82648	0.0338893
Polycyclic aromatic hydrocarbon degradation	0.0677786	NRM - R_M	-1.82648	0.0338893
Transcription machinery	0.0677786	NRM - R_M	1.82648	0.0338893
Biosynthesis of unsaturated fatty acids	0.0727442	NRM - R_M	-1.79443	0.0363721
MAPK signaling pathway - yeast	0.0727442	NRM - R_M	1.79443	0.0363721
Riboflavin metabolism	0.0727442	NRM - R_M	1.79443	0.0363721
DNA replication	0.0753364	NRM - R_M	1.77841	0.0376682
Lysine degradation	0.0753364	NRM - R_M	-1.77841	0.0376682
Tryptophan metabolism	0.0753364	NRM - R_M	-1.77841	0.0376682
Fluorobenzoate degradation	0.0780036	NRM - R_M	-1.76239	0.0390018
Pantothenate and CoA biosynthesis	0.0780036	NRM - R_M	1.76239	0.0390018
Valine, leucine and isoleucine degradation	0.0780036	NRM - R_M	-1.76239	0.0390018
Ribosome	0.0807471	NRM - R_M	1.74637	0.0403736
beta-Alanine metabolism	0.0807471	NRM - R_M	-1.74637	0.0403736
Tetracycline biosynthesis	0.0835685	NRM - R_M	1.73035	0.0417843
Replication, recombination and repair proteins	0.0925145	NRM - R_M	1.68228	0.0462572
Aminoacyl-tRNA biosynthesis	0.0988945	NRM - R_M	1.65024	0.0494472
Biotin metabolism	0.0988945	NRM - R_M	1.65024	0.0494472
Oxidative phosphorylation	0.0988945	NRM - R_M	1.65024	0.0494472
Stilbenoid, diarylheptanoid and gingerol biosynthesis	0.0988945	NRM - R_M	-1.65024	0.0494472
Zeatin biosynthesis	0.0988945	NRM - R_M	1.65024	0.0494472

## Sheet: Table 6
sample	raw_reads	Insert_size(bp)	SeqStrategy	raw_bases(GB)	Clean_Total Sequences	Clean_Sequence length	error_rate	Q20	Q30	GC_pct
BNR_T_01	20446263	350	(150:150)	6.13	20258433	50-130	0.03	96.31	90.42	46.46
BNR_T_04	24220300	350	(150:150)	7.27	24034574	50-130	0.03	97.87	93.88	45.88
BNR_T_05	22958658	350	(150:150)	6.89	22809000	50-130	0.03	97.79	93.85	46.47
BNR_T_06	22512183	350	(150:150)	6.75	22301930	50-130	0.03	97.17	92.44	47.75
BNR_T_09	22980792	350	(150:150)	6.89	22868145	50-130	0.02	98.16	94.69	48.39
BNR_T_10	21450768	350	(150:150)	6.44	21311626	50-130	0.03	97.39	92.63	47.12
BNR_T_11	21108649	350	(150:150)	6.33	20964898	50-130	0.03	97.38	92.61	46.67
BNR_T_12	22806392	350	(150:150)	6.84	22646004	50-130	0.03	97.73	93.59	46.17
BNR_T_13	21213186	350	(150:150)	6.36	21017031	50-130	0.03	97.11	92.17	47.14
BNR_T_15	22259972	350	(150:150)	6.68	22069795	50-130	0.03	97.28	92.65	45.35
BNR_T_16	23033448	350	(150:150)	6.91	22930750	50-130	0.02	98.29	94.82	48.29
BNR_T_19	22759498	350	(150:150)	6.83	22670797	50-126	0.02	98.48	95.25	48.67
BNR_T_20	22388499	350	(150:150)	6.72	22253174	50-130	0.03	97.9	94.11	47.09
BNR_T_22	19971340	350	(150:150)	5.99	19600519	50-130	0.03	96.85	92.14	47.23
BNR_T_24	24357740	350	(150:150)	7.31	24215687	50-130	0.03	97.93	94.11	48.1
BNR_T_25	23399935	350	(150:150)	7.02	23246357	50-130	0.03	97.74	93.44	47.67
BNR_T_26	23373543	350	(150:150)	7.01	23260839	50-130	0.02	98.12	94.59	51.15
BNR_T_27	21474184	350	(150:150)	6.44	21345305	50-130	0.03	97.8	93.65	49.3
BNR_T_28	22973045	350	(150:150)	6.89	22902936	50-139	0.02	98.3	94.89	50.16
BNR_T_29	22589130	350	(150:150)	6.78	22459617	50-130	0.03	97.96	94.01	49.84
BNR_T_30	22524919	350	(150:150)	6.76	22438461	50-139	0.03	97.91	93.88	50.27
BNR_T_32	22920811	350	(150:150)	6.88	22776220	50-130	0.03	97.71	93.53	48.36
BNR_T_33	23618125	350	(150:150)	7.09	23479808	50-130	0.03	97.19	92.41	47.98
BNR_T_34	20451585	350	(150:150)	6.14	20135847	50-130	0.03	97.32	92.95	47.31
BNR_T_35	22642066	350	(150:150)	6.79	22411251	50-130	0.03	96.53	91.24	46.59
BNR_T_36	21605134	350	(150:150)	6.48	21352621	50-130	0.03	97.73	93.69	48.8
BR_T_02	20271121	350	(150:150)	6.08	20117647	50-130	0.03	96.6	91.34	46.75
BR_T_03	19790518	350	(150:150)	5.94	19655442	50-130	0.03	96.21	90.4	47.51
BR_T_04	20579688	350	(150:150)	6.17	20387848	50-130	0.03	96.41	90.6	46.65
BR_T_05	22857122	350	(150:150)	6.86	22764722	50-139	0.02	98.13	94.65	49.97
BR_T_06	22085071	350	(150:150)	6.63	21979585	50-137	0.02	98.03	94.45	50.78
BR_T_07	22194572	350	(150:150)	6.66	22098146	50-135	0.03	97.26	92.37	49.55
BR_T_08	22732028	350	(150:150)	6.82	22615856	50-129	0.02	98.15	94.68	47.77
BR_T_09	22624639	350	(150:150)	6.79	22464742	50-130	0.03	96.18	90.2	45.83
BR_T_10	22112632	350	(150:150)	6.63	21848601	50-130	0.03	95.66	89.4	46.96
BR_T_11	23283737	350	(150:150)	6.99	23199291	50-139	0.02	98.23	94.86	50.27
BR_T_13	20573317	350	(150:150)	6.17	20357465	50-130	0.03	96.59	91.26	46.89
BR_T_15	20838782	350	(150:150)	6.25	20687686	50-130	0.03	96.13	90.13	46.81
BR_T_16	21535433	350	(150:150)	6.46	21402395	50-130	0.03	96.27	90.43	47.47
BR_T_17	19705663	350	(150:150)	5.91	19579467	50-130	0.03	96.88	91.53	47.79
BR_T_18	23704458	350	(150:150)	7.11	23584226	50-130	0.03	96.8	91.38	47.11
BR_T_19	21118966	350	(150:150)	6.34	20957430	50-130	0.03	97.87	94.15	48
BR_T_20	21818746	350	(150:150)	6.55	21706179	50-130	0.02	98.06	94.4	48.36
BR_T_21	22925507	350	(150:150)	6.88	22793980	50-130	0.02	98	94.37	48.17
BR_T_22	23593421	350	(150:150)	7.08	23504451	50-135	0.02	98.21	94.73	48.41
BR_T_23	23449009	350	(150:150)	7.03	23358272	50-135	0.02	98.14	94.56	47.88
BR_T_24	22387839	350	(150:150)	6.72	22249452	50-130	0.03	96.73	91.34	47.05
BR_T_25	22998654	350	(150:150)	6.9	22910466	50-135	0.02	98.24	94.81	48.28
BR_T_27	21205984	350	(150:150)	6.36	21075891	50-130	0.03	96.39	90.66	47.42
BR_T_28	20510447	350	(150:150)	6.15	20400730	50-130	0.03	96.95	91.84	48.6
BR_T_29	25833568	350	(150:150)	7.75	25642655	50-130	0.03	96.28	90.47	47.17
BR_T_30	21337513	350	(150:150)	6.4	21165912	50-130	0.03	96.05	90.11	48.32
BR_T_31	20411423	350	(150:150)	6.12	20234616	50-130	0.03	96.52	91.05	46.29
BR_T_32	23663406	350	(150:150)	7.1	23549939	50-135	0.02	98.05	94.39	46.15
BR_T_33	24622996	350	(150:150)	7.39	24510251	50-130	0.02	98.16	94.64	48.16
BR_T_34	19993102	350	(150:150)	6	19857545	50-130	0.03	96.73	91.48	47.81
BR_T_35	20287307	350	(150:150)	6.09	20135858	50-130	0.03	96.2	90.53	48.08

## Sheet: Table 7
gene	baseMean	log2FoldChange	lfcSE	stat	pvalue	padj	symbol	entrez	name	BNR_T_01	BNR_T_04	BNR_T_05	BNR_T_06	BNR_T_09	BNR_T_10	BNR_T_11	BNR_T_12	BNR_T_13	BNR_T_15	BNR_T_16	BNR_T_19	BNR_T_20	BNR_T_22	BNR_T_24	BNR_T_25	BNR_T_26	BNR_T_27	BNR_T_28	BNR_T_29	BNR_T_30	BNR_T_32	BNR_T_33	BNR_T_34	BNR_T_35	BNR_T_36	BR_T_02	BR_T_03	BR_T_04	BR_T_05	BR_T_06	BR_T_07	BR_T_08	BR_T_09	BR_T_10	BR_T_11	BR_T_13	BR_T_15	BR_T_16	BR_T_17
ENSG00000011465	16581.3	-1.30241	0.343906	-3.78712	0.000152403	0.0358548	DCN	1634	decorin	87.281	12.6413	30.1719	34.5408	22.3495	68.0154	77.6861	18.0132	40.1948	104.749	74.879	82.2419	53.1237	7.76723	80.8777	73.0776	28.0109	114.402	45.5127	46.3591	92.6607	62.4362	33.6472	19.3579	58.4984	43.9175	13.8641	80.6701	52.202	416.805	14.163	96.7739	9.26103	5.79796	15.4321	104.333	113.429	328.883	18.8153	177.412
ENSG00000025434	1986.59	-1.00011	0.262418	-3.81115	0.00013832	0.0358548	NR1H3	10062	nuclear receptor subfamily 1 group H member 3	21.1424	5.68978	15.0167	33.2466	6.85759	4.28845	7.02251	10.3868	11.515	15.9115	10.5873	16.3082	17.118	6.63243	23.2711	8.92573	17.4718	8.71699	15.8927	5.22674	20.2099	20.1683	7.24552	15.4799	16.2021	24.1256	9.01803	7.86533	3.44425	12.7021	27.7573	63.7273	10.8304	3.62562	15.3522	22.1151	16.6854	15.8241	17.0714	216.969
ENSG00000079308	2803.37	-1.11692	0.305584	-3.65505	0.000257135	0.0446697	TNS1	7145	tensin 1	3.60054	2.26816	2.22183	1.70018	2.14102	4.39844	3.04679	0.997692	2.81739	1.52817	2.39099	7.22636	1.77599	0.835429	3.27084	3.83748	1.76399	2.44512	1.97789	0.543945	3.71484	5.13881	1.92406	2.28972	1.89156	1.88098	2.57836	1.07589	2.45527	9.35308	2.24723	5.70684	1.96725	1.01982	1.21907	3.49871	0.932603	3.85213	1.71019	17.7362
ENSG00000099337	2280.61	1.16387	0.316489	3.67744	0.000235585	0.0446697	KCNK6	9424	potassium two pore domain channel subfamily K member 6	14.5726	21.6663	9.7224	11.8566	3.3691	6.32337	3.69403	3.99504	3.04849	30.2859	2.65393	1.39131	3.26586	8.73152	3.10867	3.80032	2.66389	8.40656	0.944155	20.9557	4.29242	26.5741	11.4811	5.71737	6.21003	14.727	2.41133	1.27405	2.5194	3.44033	3.26258	3.088	4.33458	2.29441	9.7872	7.61481	6.93541	0.697688	1.19101	2.43421
ENSG00000100836	10768.1	1.09627	0.251492	4.35907	1.30618e-05	0.00729831	PABPN1	8106	poly(A) binding protein nuclear 1	109.509	81.1083	71.9731	104.36	35.6135	60.8909	62.6677	46.3302	32.6417	105.99	35.2028	48.1615	36.1435	423.687	43.9328	95.6646	40.5988	99.6223	38.7928	47.9993	76.3861	168.445	69.1654	261.946	182.549	79.2946	90.6475	43.4644	13.6181	52.0686	53.5605	21.8649	41.5698	7.82998	96.0925	34.0783	22.6913	16.8324	49.9792	40.0418
ENSG00000106484	1698.52	-1.0328	0.260331	-3.96725	7.27075e-05	0.0270835	MEST	4232	mesoderm specific transcript	8.60748	7.02424	5.6638	4.01291	7.23355	10.9227	1.14958	3.78876	2.30778	2.44711	17.1636	17.2018	4.05786	2.55594	4.88304	5.01219	9.81293	10.6784	10.5873	5.88033	1.80303	9.26583	8.26112	5.94765	8.9286	7.71024	3.0677	6.12836	2.97363	32.474	1.61821	12.9682	18.3036	1.28051	4.97179	16.391	2.90654	3.45274	10.7018	21.7105
ENSG00000135218	8378.8	-2.96281	0.586138	-5.05479	4.30854e-07	0.000385183	CD36	948	CD36 molecule	0.932948	2.97082	0.532753	5.8242	6.83598	2.23092	12.7518	1.54048	6.63345	1.35843	0.704624	96.0086	3.38422	5.97658	2.44917	1.6875	1.26319	0.65115	1.65941	1.59301	2.73853	9.08794	5.79893	9.17742	0.307911	29.4145	11.3422	1.12181	5.08516	10.4383	4.3165	396.91	2.64707	2.96909	1.44986	2.08145	22.8084	6.58784	0.916276	392.197
ENSG00000147872	2822.46	-1.265	0.337813	-3.74468	0.000180624	0.0384471	PLIN2	123	perilipin 2	8.03978	5.30533	11.1513	13.2215	6.04443	8.31942	14.7287	3.99897	60.6715	22.3944	20.1013	17.5041	15.1139	4.02538	7.89626	11.0354	7.64711	19.8141	15.2135	16.3845	9.85829	10.9717	4.5308	5.96336	7.38743	10.039	5.64749	4.39909	18.5204	20.3563	12.6789	223.477	10.0911	36.6775	12.4031	19.436	7.71784	51.1092	5.02822	58.4687
ENSG00000158417	4330.06	1.2785	0.236699	5.40139	6.6128e-08	0.000138304	EIF5B	9669	eukaryotic translation initiation factor 5B	30.5539	8.83684	11.2251	25.1094	11.696	11.9487	17.0181	5.08101	6.76779	28.5526	11.1136	7.35266	14.3885	45.6514	9.21893	17.0364	6.70376	9.57616	10.9432	11.1798	8.30551	28.1761	9.0537	43.9424	16.561	25.6026	7.7807	8.3258	1.80729	6.84801	6.93377	4.55912	11.8414	1.64719	10.3554	6.65052	8.44707	1.34768	10.7578	5.07473
ENSG00000163694	3825.72	1.04783	0.268814	3.89799	9.69952e-05	0.0309692	RBM47	54502	RNA binding motif protein 47	31.4775	32.4681	24.3807	13.1448	20.5973	15.5225	19.7977	9.13102	6.27605	41.7585	9.13249	15.0516	24.1449	11.4161	7.87209	11.2351	5.64985	7.55805	4.25846	5.61855	3.49176	28.6771	20.8784	21.0805	20.2174	14.3632	11.2288	7.45568	1.33259	5.14607	2.21826	7.20449	15.5862	4.3152	17.2841	13.0338	6.49165	1.28056	1.91122	1.49749
ENSG00000168899	2544.07	-1.04978	0.278656	-3.76731	0.000165016	0.0368811	VAMP5	10791	vesicle associated membrane protein 5	36.1359	13.7098	6.99008	86.7735	27.3721	24.4098	59.9154	14.2946	46.4535	25.4536	23.145	46.5759	51.3425	9.37433	30.3155	27.3518	46.8088	38.0702	54.2059	102.757	58.0689	64.8532	34.1066	4.70037	23.1079	86.2863	7.95576	24.4477	65.5701	78.0955	50.9799	228.494	31.6354	13.6136	23.4949	42.4041	53.1472	82.5901	111.139	210.491
ENSG00000170345	7507.4	-1.26876	0.331111	-3.83181	0.000127202	0.0358548	FOS	2353	Fos proto-oncogene, AP-1 transcription factor subunit	10.4122	33.6419	43.3589	25.8449	50.2357	82.0568	44.6386	8.53923	23.4605	54.5425	24.7048	88.1241	13.7632	11.0236	34.4463	73.1224	46.4661	9.81359	7.53048	30.3341	35.1792	27.229	77.3328	11.9336	7.5708	33.1518	118.394	22.2284	17.9537	91.8044	8.98818	70.0584	6.15652	20.9351	8.5528	101.814	14.5524	20.1212	25.929	194.89
ENSG00000187134	1340.28	-2.52428	0.497838	-5.07049	3.96787e-07	0.000385183	AKR1C1	1645	aldo-keto reductase family 1 member C1	1.00173	0.495791	1.41486	0.380254	0.453928	1.28278	1.24382	0.636853	3.07669	0.956471	0.599909	4.22211	0.326239	0.832889	0.737015	1.55976	0.058755	0.059621	0.922971	0.341458	0.544408	0.931457	0.336673	3.55444	0.1649	2.07846	0.815263	5.85294	1.93007	2.24059	0.518456	6.11172	0.715214	0.117522	0.284981	0.228405	0.506973	4.24088	1.27982	27.5807
ENSG00000196139	1439.82	-2.01912	0.349507	-5.77704	7.60244e-09	3.39829e-05	AKR1C3	8644	aldo-keto reductase family 1 member C3	6.47523	2.3689	3.33637	7.225	5.00943	10.6149	15.7057	1.74707	5.68335	3.52831	19.9524	26.2096	2.58556	7.75719	5.13768	1.42397	1.37191	5.79688	17.2193	7.4425	5.95546	9.55731	4.68067	2.80959	4.86601	26.5102	49.4002	29.9379	27.1286	16.2691	3.65258	39.9043	4.53385	2.41421	1.0898	8.08277	6.48587	19.0611	14.1497	104.423
ENSG00000254996	2867.87	1.19336	0.262718	4.54237	5.56247e-06	0.00414404	ANKHD1-EIF4EBP3	404734	ANKHD1-EIF4EBP3 readthrough	8.58716	5.99001	8.54921	10.3385	8.42903	5.89424	4.80548	2.22258	2.2167	13.5225	7.07825	6.58885	6.85603	20.6895	6.07935	9.16698	5.25371	10.3348	3.81365	8.71341	3.52635	15.0211	7.80797	23.1922	7.64575	21.8032	9.01858	2.73098	0.389597	2.93426	8.19428	2.59031	4.81712	1.05669	4.76179	9.88683	3.02526	0.465209	2.62698	4.29447
ENSG00000265972	14031.1	-1.16562	0.324748	-3.58931	0.000331551	0.049401	TXNIP	10628	thioredoxin interacting protein	63.5284	22.0249	14.2238	86.7608	37.2042	19.965	75.3685	25.8828	45.3785	27.8816	36.3745	215.297	69.3271	7.40209	43.1431	15.6279	42.4017	18.4577	35.0796	21.7402	94.2832	64.977	56.7453	13.56	8.07362	73.6099	8.39347	22.6661	44.9557	179.504	237.694	152.419	31.6243	14.4829	15.7739	101.425	35.5017	120.484	16.4977	253.45
[truncated: 17 more columns]

## Sheet: Table 8
Mixture	B cells naive	B cells memory	Plasma cells	T cells CD8	T cells CD4 naive	T cells CD4 memory resting	T cells CD4 memory activated	T cells follicular helper	T cells regulatory (Tregs)	T cells gamma delta	NK cells resting	NK cells activated	Monocytes	Macrophages M0	Macrophages M1	Macrophages M2	Dendritic cells resting	Dendritic cells activated	Mast cells resting	Mast cells activated	Eosinophils	Neutrophils	P-value	Correlation	RMSE	Absolute score (sig.score)
BNR_T_01	0.0717858	0.0626596	0.373993	0.468635	0	0.4509	0	0.15861	0.101997	0	0	0.234532	0.0445784	0.157029	0.245974	0.372071	0.0334858	0	0.258817	0	0	0.00168118	0	0.7714	0.728134	3.03675
BNR_T_04	0.0322167	0.0293307	0.159893	0.144424	0	0.292798	0.0305089	0.115833	0	0.00419421	0	0.0300143	0.0250388	0	0.16399	0.277451	0.043753	0	0.108331	0	0.00869543	0	0	0.70716	0.769241	1.46647
BNR_T_05	0.0619236	0	0.297603	0.160508	0	0.127695	0.0416998	0.0661751	0	0.00836712	0.0217237	0.0394038	0	0.131136	0.0853883	0.465172	0.00587638	0.011071	0.126268	0	0.0238361	0.0201725	0	0.579988	0.83716	1.69402
BNR_T_06	0.266124	0.864502	0.0403324	1.48582	0	0	0.473143	0.399507	0.320337	0.524443	0	0.325345	0	0.525131	0.65618	0.941991	0	0	0.186569	0	0	0	0	0.658959	0.778886	7.00942
BNR_T_09	0.0403515	0.0376417	0.211766	0.247671	0	0.19701	0	0.173588	0.0839159	0	0	0.174604	0.0420683	0	0.18511	0.364418	0.0377639	0.00125232	0.0479638	0.0137848	0.0150561	0.0219359	0	0.259249	0.979338	1.8959
BNR_T_10	0.106247	0	0.0857209	0.164896	0	0.183932	0.0125699	0.0747907	0.0167701	0	0	0.118274	0.0380133	0	0.129316	0.393728	0.00717672	0	0.109191	0.0474294	0.0183898	0.0206095	0	0.697627	0.769654	1.52706
BNR_T_11	0.123586	0.0278735	0.177364	0.201227	0	0.293192	0.0306801	0.0917245	0.067712	0.0550164	0	0.103275	0.025825	0.0407787	0.170101	0.393209	0.0381956	0	0.133677	0	0	0.00868547	0	0.665876	0.790812	1.98212
BNR_T_12	0.0878217	0.306368	0.0984648	0.225798	0	0.166057	0.0358595	0.12929	0.051618	0.166664	0	0.109885	0	0.112088	0.190718	0.253261	0.016909	0	0.129088	0	0	0	0	0.750985	0.736223	2.07989
BNR_T_13	0	0.0488083	0.00728321	0.0709048	0	0.234589	0.153712	0.0102565	0	0	0	0.0597215	0.0636784	0.0562988	0.123999	0.678797	0.129435	0	0.0489821	0	0.16433	0.024818	0	0.67172	0.778448	1.87561
BNR_T_15	0.0325545	0.0117862	0.104787	0.160328	0	0.127763	0.0766914	0.113194	0.146679	0.225326	0	0.103444	0.0939781	0.256725	0.135438	0.764087	0.0307402	0	0.215137	0	0	0.00446224	0	0.605468	0.816149	2.60312
BNR_T_16	0	0.0992311	0.17546	0.207018	0	0.306544	0.01106	0.154342	0.0342929	0.0158496	0	0.110699	0.0804227	0.0888567	0.224344	0.591649	0.0562906	0	0.19157	0	0	0.0123822	0	0.685316	0.781338	2.36001
BNR_T_19	0.0351909	0	0.209607	0.592046	0	0.128456	0	0.193621	0	0	0	0.140143	0.0478898	0	0.169801	0.322888	0.0334765	0	0	0.0722501	0.0115299	0.0123356	0	0.503779	0.86381	1.96923
BNR_T_20	0.0638556	0	0.150598	0.46427	0	0.185367	0.112338	0.347346	0.0860511	0.155706	0	0.0729913	0	0.100903	0.333953	0.785798	0.00403495	0	0.0809818	0	0	0.00484691	0	0.76481	0.718893	2.94904
BNR_T_22	0.0417218	0	0.0811965	0.0559824	0	0.229473	0.0370461	0.0492831	0.0413528	0	0.090665	0	0.0436266	0	0.0336887	0.162251	0.00792797	0.0242968	0.00491939	0.0410339	0.0174575	0.00196829	0	0.309716	0.954508	0.96389
BNR_T_24	0.0315171	0.00580831	0.18928	0.201119	0	0.209995	0.0573209	0.0962039	0	0.0504564	0	0.061152	0.00536615	0	0.166864	0.698253	0.024371	0	0.160567	0.0346526	0	0.0158819	0	0.743534	0.746393	2.00881
BNR_T_25	0.0239649	0	0.3148	0.133806	0	0.172594	0.0308889	0.114916	0.0441592	0	0	0.116816	0	0.198933	0.159217	0.684681	0	0	0.0138526	0.0151696	0	0.00363553	0	0.77781	0.715865	2.02743
BNR_T_26	0.164243	0.254345	0.532035	0.810092	0	0.0611398	0.318232	0.412833	0.0612285	0.409365	0	0.224021	0	0.503435	0.282338	0.411507	0	0	0.0392817	0	0	0	0	0.677516	0.773151	4.48409
BNR_T_27	0.0286488	0.00203887	0.218105	0.0855034	0	0.0542661	0.124854	0.0673455	0.00623245	0	0.0459762	0.0249161	0.0036169	0.20371	0.198951	0.477271	0.0207997	0	0.0148963	0.0477267	0.00610016	0.00621937	0	0.675586	0.772397	1.63718
BNR_T_28	0.127402	0.481334	0.266175	0.65719	0	0	0.0699966	0.350835	0.124766	0.211953	0	0.286756	0	0.361202	0.34891	0.632753	0	0	0.00432497	0	0	0	0	0.767288	0.717918	3.9236
BNR_T_29	0.0732011	0	0.0847501	0.423151	0	0.126995	0	0.2262	0.0571781	0.13498	0	0.122721	0	0.419938	0.178271	0.680878	0	0	0.0533872	0.0955421	0	0.0052324	0	0.725847	0.737635	2.68242
BNR_T_30	0.272969	0.340815	0.210301	1.14986	0	0.312725	0	0.608641	0.261498	2.24264e-05	0	0.420769	0	0.346131	0.376672	0.415753	0.015171	0	0.0577282	0	0	0	0	0.74557	0.717122	4.78905
BNR_T_32	0.0546221	0	0.256543	0.330334	0	0.163702	0	0.187688	0.00176572	0	0	0.0992433	0.031235	0.0295612	0.0697355	0.406088	0.0123554	0.00283349	0	0.0447501	0	0.0057233	0	0.560896	0.838993	1.69618
BNR_T_33	0.0456514	0	0.389467	0.0814424	0.0189607	0.0593933	0.0120894	0.0870524	0	0	0.0214268	0.0693508	0.0141192	0.126699	0.0786394	0.396529	0.0114294	0	0.076782	0.0249035	0.00264409	0	0	0.540004	0.852793	1.51658
BNR_T_34	0.0440614	0.00398986	0.0960097	0.0903428	0	0.192987	0	0.171716	0.0472495	0	0	0.0612751	0.0240287	0.0833775	0.162563	0.413901	0.0228229	0	0.0148031	0.0148001	0.00600191	0	0	0.549519	0.842841	1.44993
BNR_T_35	0.0312339	0.00197807	0.204818	0.119769	0	0.0524813	0.02188	0.148016	0.00629673	0	0.0370187	0.0575749	0.0262256	0.068813	0.132715	0.413297	0.0125939	0.0587566	0.105225	0	0	0.00876686	0	0.601157	0.823633	1.50746
BNR_T_36	0.0510307	0	0.150644	0.124199	0	0.33725	0	0.104849	0.0962711	0	0.0585746	0.0123936	0.0286436	0.0120625	0.16593	0.28058	0.0151836	0	0.0147258	0.0364866	0.00109099	0	0	0.591798	0.821715	1.48991
BR_T_02	0.0447103	0	0.508701	0.0540633	0	0	0.00570934	0.187269	0.0207612	0.0700165	0.00183589	0.0442878	0	0.355973	0.0745203	0.280068	0.0123954	0	0.00228243	0.0372342	0.0135421	0	0	0.72405	0.748531	1.71337
BR_T_03	0.037164	0	0.0574105	0.154357	0	0.0774839	0	0.160298	0.0224069	0.0586574	0	0.0497881	0	0.267769	0.137538	0.566247	0.00222104	0	0.0071628	0.0796218	0.00644641	0.0020001	0	0.738929	0.72398	1.68657
BR_T_04	0.0493053	0.0324287	0	0.12785	0	0.201724	0.146388	0.0700432	0	0	0.0220273	0.00319221	0.185986	0.00221442	0.0388986	0.394164	0.0162953	0.00351003	0.139394	0	0.0341987	0.0312496	0	0.616135	0.819843	1.49887
BR_T_05	0.0832601	0.0303046	0.0470746	0.441888	0	0.487384	0	0.204058	0.25404	0	0	0.109215	0	0.247066	0.319604	0.499621	0.0639866	0	0.175663	0	0	0.0085243	0	0.779967	0.70962	2.97169
BR_T_06	0.132177	2.37006	0.465945	2.09688	1.05861	0.316271	0	0.398081	0.356884	0.147343	0	0.424614	0.0117477	0.0957364	0.366956	1.06804	0	0.0305165	0.0235259	0	0	0	0	0.746436	0.720158	9.36339
BR_T_07	0.0211189	0.0173807	0	0.0835277	0	0.414508	0.0994764	0.000996104	0	0.0388537	0.0428994	0.0146842	0	0.02712	0.309727	2.29133	0.0241284	0	0.357877	0	0	0.0192056	0	0.692924	0.739263	3.76283
BR_T_08	0.0479629	0.00452289	0.153929	0.176644	0	0.272253	0.0596068	0.139448	0.0727311	0.00391254	0.00401475	0.0741367	0.0221863	0.0599136	0.18251	0.383263	0.0371578	0.0147158	0.089954	0	0.0034392	0.0236758	0	0.478787	0.880074	1.82598
BR_T_09	0.0120201	0.0251568	0.0123309	0.0416392	0	0.0789791	0	0.0577317	0.0202684	0.0243955	0	0.0869113	0.122842	0.0988916	0.0694335	0.18267	0.0378738	0	0	0.201418	0.0303078	0.0544132	0	0.60335	0.807546	1.15728
BR_T_10	0.0295319	0.00727643	0.372111	0.186332	0	0.143476	0.0230966	0.159834	0.0420677	0.113859	0	0.115764	0	0.105979	0.208375	0.359856	0.0417071	0	0.197937	0	0.00110574	0.00675015	0	0.748073	0.748839	2.11506
BR_T_11	0.0596093	0	0.13455	0.647709	0	0.470758	0	0.158009	0.0921955	0	0	0.173708	0.31268	0	0.209234	0.948326	0.00417853	0.00440883	0.0484719	0.0515838	0	0	0	0.738585	0.736772	3.31542
BR_T_13	0	0.0687666	0.0149186	0.0572471	0	0.127254	0.0565133	0.061024	0.0225683	0.0492982	0	0.0680176	0.0721274	0.00883439	0.0816418	0.343416	0.0335726	0.0178062	0.262578	0	0	0.00588813	0	0.671318	0.787916	1.35147
BR_T_15	0.0383614	0.0483637	0.0193271	0.113546	0	0.426308	0.00197995	0.0957243	0.00907143	0.024942	0	0.0277611	0.0138661	0.0154669	0.0940908	0.31734	0.0161833	0	0.109694	0	0	0.0108236	0	0.703629	0.760957	1.38285
BR_T_16	0.0657398	0.00561181	0.0872506	0.157687	0	0.208794	0.0517855	0.097484	0	0.046405	0	0.0973597	0.00636817	0.0441277	0.153035	0.383366	0.016775	0	0.0198746	0.0428455	0.0064876	0.0139099	0	0.639045	0.795018	1.50491
BR_T_17	0.078656	0	0.0897741	0.239953	0	0.0159026	0.350235	0.0485791	0	0	0	0.120209	0.0262849	0	0.135467	0.800707	0.0109615	0.024607	0.0232316	0.00887073	0.00675808	0	0	0.523637	0.855446	1.9802
BR_T_18	0.187077	0	0.115228	0.332209	0	0.442338	0.269561	0.128547	0.103592	0	0.0569927	0.00382467	0.0232972	0.0975905	0.374239	0.367239	0.0107025	0.00159026	0.111702	0	0	0.00379093	0	0.792766	0.705085	2.62952
BR_T_19	0.0455877	0	0.229457	0.281093	0	0.204724	0.0977577	0.186993	0.0266572	0.0314199	0	0.0810272	0.0167197	0.223208	0.243236	0.703589	0.0106109	0	0.0246207	0.0115476	0	0.00966473	0	0.728325	0.746571	2.42791
BR_T_20	0.0415679	0.0333411	0.135891	0.198124	0	0.433889	0	0.118897	0.0635653	0	0.0126603	0.117964	0.0501223	0.0722354	0.173535	0.358258	0.0293387	0	0.125337	0	0	0	0	0.176111	1.013	1.96473
BR_T_21	0.0423658	0	0.189754	0.121643	0	0.0822072	0.022944	0.122246	0.0125956	0	0.0552957	0.0460384	0.0239909	0.170633	0.101503	0.348375	0.0115584	0.0101344	0.0372397	0.0152751	0.00772165	0.00109018	0	0.496914	0.871706	1.42261
BR_T_22	0.0409091	0.0344591	0.0438366	0.285418	0	0.13183	0.0309565	0.0582499	0	0	0.0199549	0.169099	0.0796964	0	0.110017	0.885171	0.0303878	0	0.012159	0.0594278	0.0227514	0	0	0.507616	0.861591	2.01432
BR_T_23	0.0655741	0	0.0684227	0.303809	0	0.30842	0	0.172874	0.0802808	0.0772531	0	0.0248699	0	0.222639	0.235618	0.646477	0.0145595	0	0.113394	0.0119083	0	0.0127227	0	0.820198	0.686522	2.35882
BR_T_24	0.0385811	0	0.0848107	0.079306	0	0.109767	0.07259	0.0703546	0.0182585	0.0118716	0.0558103	0	0.0783132	0.0573092	0.0645466	0.265681	0.0202763	0.00128507	0.0486004	0	0.0179267	0.0189433	0	0.480369	0.882253	1.11423
BR_T_25	0.185685	0.15546	0.209395	0.511944	0	0.684006	0.00507272	0.124707	0.132963	0	0	0.0722141	0.0225446	0.209012	0.272312	0.455244	0.0062861	0	0.0387933	0	0	0.00530271	0	0.817507	0.688596	3.09094
BR_T_27	0.046468	0.0295202	0.0433174	0.061683	0	0.145512	0.0609877	0.0720837	0	0	0.0116989	0.0284881	0.0520169	0	0.0767145	0.902492	0.000284854	0.00276283	0.134933	0	0	0.00987427	0	0.645411	0.78326	1.67884
BR_T_28	0.270892	0.311531	0.0242803	0.759038	0	0.209927	0.0154644	0.341968	0.0168404	0.218187	0.00843905	0.0539594	0	0	0.323559	0.820649	0.138281	0	0.0890731	0	0	0.00243183	0	0.676137	0.7728	3.60452
BR_T_29	0.0222154	0	0.470361	0.0894263	0.0394076	0.056508	0.0112719	0.113995	0.0283428	0.0117867	0	0.0283035	0.0149627	0.0374385	0.051362	0.20992	0.0186564	0.00333695	0.0322393	0.0126193	0	0.00777769	0	0.649051	0.797012	1.25993
BR_T_30	0	0.0864645	0.084012	0.0114016	0	0.199106	0.174411	0.0811161	0.0231668	0.0248168	0.06723	0.00839242	0	1.10972	0.0760315	0.406491	0	0.148178	0.0278092	0.00413943	0	0	0	0.499445	0.867998	2.53249
BR_T_31	0	0.120341	0.329554	1.02797	0	0.0634288	0.507114	0.458531	0	0.176826	0	0.282047	0.0355573	0.207913	0.600609	0.461719	0.0736541	0	0.32285	0	0	0	0	0.727256	0.737391	4.66812
BR_T_32	0.0635602	0	0.210688	0.106024	0	0.221498	0	0.133857	0.00164226	0.0815272	0	0.0891426	0.0993481	0.0455992	0.108739	0.628732	0.02432	0	0.108818	0	0.0116382	0.00382272	0	0.731143	0.757554	1.93896
BR_T_33	0.103706	0	0.239749	0.340253	0	0.131799	0	0.281402	0.0558343	0	0.0648249	0	0.00742687	0.246913	0.0544779	0.38731	0	0.00897817	0.0428168	0.00520279	0	0	0	0.583753	0.829189	1.97069
BR_T_34	0.0765683	0	0.0659198	0.24317	0	0.374081	0.0317617	0.032258	0	0	0	0.0289345	0.258672	0.033723	0.0754183	0.488791	0.00754629	0	0.12276	0	0.0221058	0.0125328	0	0.642264	0.801735	1.87424
BR_T_35	0.169433	0.0984136	0.099906	0.784624	0	0.348301	0.18963	0.456031	0.140622	0.099275	0	0.226545	0.0523712	0.211833	0.414328	0.610194	0.0408251	0	0.10064	0	0	0.0079122	0	0.783099	0.702612	4.05088

## Sheet: Table 9
feature_1	feature_2	r_value	fdr_p_value	raw_p_value
ENSG00000011465	Ruminococcus	0.04434	0.87795	0.7433
ENSG00000025434	Ruminococcus	0.00039	0.99768	0.99768
ENSG00000079308	Ruminococcus	0.15172	0.55795	0.25989
ENSG00000099337	Ruminococcus	0.09151	0.7202	0.49842
ENSG00000100836	Ruminococcus	0.22814	0.30121	0.08785
ENSG00000106484	Ruminococcus	0.03569	0.90131	0.79211
ENSG00000135218	Ruminococcus	0.17421	0.43191	0.19496
ENSG00000147872	Ruminococcus	-0.12429	0.62763	0.35697
ENSG00000158417	Ruminococcus	0.14111	0.57423	0.29509
ENSG00000163694	Ruminococcus	0.3367	0.167	0.01044
ENSG00000168899	Ruminococcus	-0.10849	0.67206	0.42181
ENSG00000170345	Ruminococcus	0.14559	0.55863	0.27987
ENSG00000187134	Ruminococcus	0.25487	0.28668	0.05571
ENSG00000196139	Ruminococcus	0.05416	0.83776	0.68903
ENSG00000254996	Ruminococcus	0.21855	0.31084	0.10242
ENSG00000265972	Ruminococcus	0.01816	0.94589	0.89334
ENSG00000011465	Anaerostipes	-0.06688	0.79852	0.62107
ENSG00000025434	Anaerostipes	0.02634	0.91758	0.84577
ENSG00000079308	Anaerostipes	0.11869	0.62763	0.37919
ENSG00000099337	Anaerostipes	0.23329	0.29928	0.08073
ENSG00000100836	Anaerostipes	0.24573	0.29642	0.0654
ENSG00000106484	Anaerostipes	0.02473	0.91758	0.85509
ENSG00000135218	Anaerostipes	0.08269	0.72788	0.54085
ENSG00000147872	Anaerostipes	-0.2128	0.32491	0.112
ENSG00000158417	Anaerostipes	0.36355	0.167	0.00544
ENSG00000163694	Anaerostipes	0.38682	0.15571	0.00296
ENSG00000168899	Anaerostipes	-0.11518	0.644	0.39356
ENSG00000170345	Anaerostipes	-0.12104	0.62763	0.36979
ENSG00000187134	Anaerostipes	0.01581	0.94654	0.9071
ENSG00000196139	Anaerostipes	-0.1247	0.62763	0.35539
ENSG00000254996	Anaerostipes	0.34555	0.167	0.00847
ENSG00000265972	Anaerostipes	-0.02561	0.91758	0.85
ENSG00000011465	Weissella	0.08723	0.72687	0.5188
ENSG00000025434	Weissella	0.22349	0.30304	0.0947
ENSG00000079308	Weissella	0.1869	0.39117	0.1639
ENSG00000099337	Weissella	0.23841	0.29642	0.07411
ENSG00000100836	Weissella	0.26754	0.27688	0.04422
ENSG00000106484	Weissella	0.12528	0.62763	0.35312
ENSG00000135218	Weissella	0.1446	0.55863	0.28319
ENSG00000147872	Weissella	-0.04318	0.87795	0.74981
ENSG00000158417	Weissella	0.26271	0.28668	0.04835
ENSG00000163694	Weissella	0.29432	0.21517	0.02626
ENSG00000168899	Weissella	0.12396	0.62763	0.35824
ENSG00000170345	Weissella	-0.02561	0.91758	0.85
ENSG00000187134	Weissella	0.13845	0.5844	0.30438
ENSG00000196139	Weissella	0.1506	0.55795	0.26348
ENSG00000254996	Weissella	0.31891	0.21517	0.01561
ENSG00000265972	Weissella	0.24324	0.29642	0.06826
ENSG00000011465	Butyrivibrio	-0.06385	0.80778	0.63701
ENSG00000025434	Butyrivibrio	-0.10045	0.68581	0.45721
ENSG00000079308	Butyrivibrio	0.0836	0.72788	0.5364
ENSG00000099337	Butyrivibrio	0.20111	0.34976	0.13359
ENSG00000100836	Butyrivibrio	0.23191	0.29928	0.08259
ENSG00000106484	Butyrivibrio	-0.01599	0.94654	0.90602
ENSG00000135218	Butyrivibrio	0.10356	0.67912	0.44331
ENSG00000147872	Butyrivibrio	-0.09111	0.7202	0.50028
ENSG00000158417	Butyrivibrio	0.2464	0.29642	0.06465
ENSG00000163694	Butyrivibrio	0.3535	0.167	0.00699
ENSG00000168899	Butyrivibrio	-0.12256	0.62763	0.36377
ENSG00000170345	Butyrivibrio	0.10882	0.67206	0.42038
ENSG00000187134	Butyrivibrio	-0.07158	0.78197	0.59672
ENSG00000196139	Butyrivibrio	-0.18952	0.38741	0.15795
ENSG00000254996	Butyrivibrio	0.33891	0.167	0.00991
ENSG00000265972	Butyrivibrio	0.0352	0.90131	0.7949
ENSG00000011465	Dechloromonas	-0.00916	0.97309	0.94606
ENSG00000025434	Dechloromonas	-0.03133	0.91758	0.81706
ENSG00000079308	Dechloromonas	-0.04316	0.87795	0.74991
ENSG00000099337	Dechloromonas	0.20855	0.33744	0.11951
ENSG00000100836	Dechloromonas	0.12078	0.62763	0.37082
ENSG00000106484	Dechloromonas	-0.03651	0.90131	0.78744
ENSG00000135218	Dechloromonas	-0.14477	0.55863	0.28263
ENSG00000147872	Dechloromonas	-0.19095	0.38741	0.15477
ENSG00000158417	Dechloromonas	0.06338	0.80778	0.63949
ENSG00000163694	Dechloromonas	0.05356	0.83776	0.69232
ENSG00000168899	Dechloromonas	-0.03892	0.89857	0.77377
ENSG00000170345	Dechloromonas	-0.08609	0.72687	0.52427
ENSG00000187134	Dechloromonas	-0.06097	0.8168	0.6523
ENSG00000196139	Dechloromonas	-0.09394	0.71559	0.487
ENSG00000254996	Dechloromonas	0.29406	0.21517	0.0264
ENSG00000265972	Dechloromonas	0.00194	0.99552	0.9886
ENSG00000011465	Anaerococcus	-0.09009	0.7202	0.50514
ENSG00000025434	Anaerococcus	-0.22529	0.30304	0.09199
ENSG00000079308	Anaerococcus	-0.19296	0.38676	0.15041
ENSG00000099337	Anaerococcus	0.23151	0.29928	0.08313
ENSG00000100836	Anaerococcus	0.35432	0.167	0.00685
ENSG00000106484	Anaerococcus	-0.23418	0.29928	0.07955
ENSG00000135218	Anaerococcus	-0.22966	0.301	0.0857
ENSG00000147872	Anaerococcus	-0.29046	0.21517	0.02839
ENSG00000158417	Anaerococcus	0.30765	0.21517	0.01991
ENSG00000163694	Anaerococcus	0.30487	0.21517	0.02111
ENSG00000168899	Anaerococcus	-0.28482	0.22672	0.03176
ENSG00000170345	Anaerococcus	-0.29054	0.21517	0.02835
ENSG00000187134	Anaerococcus	-0.17743	0.42675	0.1867
ENSG00000196139	Anaerococcus	-0.18917	0.38741	0.15873
ENSG00000254996	Anaerococcus	0.22386	0.30304	0.09413
ENSG00000265972	Anaerococcus	-0.39276	0.15571	0.00251
ENSG00000011465	Thiothrix	0.04815	0.86652	0.7221
ENSG00000025434	Thiothrix	-0.00654	0.97504	0.9615
ENSG00000079308	Thiothrix	-0.00693	0.97504	0.95917
ENSG00000099337	Thiothrix	-0.14464	0.55863	0.28307
ENSG00000100836	Thiothrix	-0.18611	0.39117	0.16571
ENSG00000106484	Thiothrix	-0.07146	0.78197	0.59734
ENSG00000135218	Thiothrix	0.0144	0.94827	0.91535
ENSG00000147872	Thiothrix	-0.02853	0.91758	0.83314
ENSG00000158417	Thiothrix	-0.29172	0.21517	0.02768
ENSG00000163694	Thiothrix	-0.27554	0.24893	0.03803
ENSG00000168899	Thiothrix	0.06763	0.79852	0.61718
ENSG00000170345	Thiothrix	-0.02939	0.91758	0.82819
ENSG00000187134	Thiothrix	0.10481	0.67787	0.43779
ENSG00000196139	Thiothrix	0.1449	0.55863	0.28218
ENSG00000254996	Thiothrix	-0.12641	0.62763	0.34876
ENSG00000265972	Thiothrix	0.09867	0.69068	0.46525
ENSG00000011465	Microbacterium	0.25483	0.28668	0.05574
ENSG00000025434	Microbacterium	0.05397	0.83776	0.69009
ENSG00000079308	Microbacterium	0.20358	0.34342	0.12878
ENSG00000099337	Microbacterium	-0.17982	0.4198	0.18075
ENSG00000100836	Microbacterium	-0.20367	0.34342	0.12862
ENSG00000106484	Microbacterium	0.21781	0.31084	0.10361
ENSG00000135218	Microbacterium	0.05841	0.82684	0.66607
ENSG00000147872	Microbacterium	0.08514	0.72687	0.52889
ENSG00000158417	Microbacterium	-0.23873	0.29642	0.07372
ENSG00000163694	Microbacterium	-0.10782	0.67206	0.4247
ENSG00000168899	Microbacterium	0.07497	0.77252	0.57939
ENSG00000170345	Microbacterium	-0.02385	0.91758	0.86023
ENSG00000187134	Microbacterium	0.24458	0.29642	0.06671
ENSG00000196139	Microbacterium	0.24073	0.29642	0.07125
ENSG00000254996	Microbacterium	-0.25563	0.28668	0.05496
ENSG00000265972	Microbacterium	0.21233	0.32491	0.11282
ENSG00000011465	Deinococcus	-0.08491	0.72687	0.53001
ENSG00000025434	Deinococcus	-0.1332	0.60456	0.32327
ENSG00000079308	Deinococcus	-0.2397	0.29642	0.07251
ENSG00000099337	Deinococcus	0.11956	0.62763	0.3757
ENSG00000100836	Deinococcus	0.25658	0.28668	0.05402
ENSG00000106484	Deinococcus	-0.10608	0.67656	0.43224
ENSG00000135218	Deinococcus	-0.28278	0.22672	0.03306
ENSG00000147872	Deinococcus	-0.175	0.43191	0.19292
ENSG00000158417	Deinococcus	0.38337	0.15571	0.00324
ENSG00000163694	Deinococcus	0.3104	0.21517	0.01878
ENSG00000168899	Deinococcus	-0.10086	0.68581	0.45534
ENSG00000170345	Deinococcus	-0.15081	0.55795	0.26279
ENSG00000187134	Deinococcus	-0.13463	0.60264	0.31806
ENSG00000196139	Deinococcus	-0.20358	0.34342	0.12878
ENSG00000254996	Deinococcus	0.30109	0.21517	0.02285
ENSG00000265972	Deinococcus	-0.21888	0.31084	0.10188

[truncated: 1 more sheets: Table 10]
